## **Prevalence and factors associated with short birth interval in Kaya Municipality, North Central Burkina Faso: a multilevel Poisson regression modeling with a robust variance of a community survey**

**Short title: Prevalence and factors associated with short birth interval in Burkina Faso**

Abou Coulibaly<sup>1\*</sup>, Adama Baguiya<sup>1</sup>, Bertrand Ivlabèhiré Meda<sup>1</sup>, Tiéba Millogo<sup>2</sup>, Aristide Marie Arsène Koumbem<sup>2</sup>, Franck Garanet<sup>1</sup>, Seni Kouanda<sup>1,2</sup>

### **Affiliations**

<sup>1</sup> Département Biomédical et Santé Publique, Institut de Recherche en Science de la Santé (IRSS), Centre National de la Recherche Scientifique et Technologique (CNRST), Ouagadougou, Burkina Faso

<sup>2</sup> Institut Africain de Santé Publique, Ouagadougou, Burkina Faso

\* Corresponding author

E-mail: [samsoncoul@gmail.com](mailto:samsoncoul@gmail.com) (AC)

## Abstract

A short birth interval adversely affects the health of mothers and children. This study aimed to measure the prevalence of short birth intervals and identify their associated factors in a semi-urban setting in Burkina Faso. We conducted a cross-sectional study in which data were collected in households between May and October 2022. The dependent variable was the short birth interval (SBI), defined by the World Health Organization as the time between two live births. We performed a multilevel mixed-effects Poisson regression with robust variance to determine the factors associated with the SBI by reporting adjusted prevalence ratios (aPR) with a 95% confidence interval (CI). A total of 5544 birth intervals were recorded from 4067 women. A short birth interval was found in 1503 cases out of 5544, i.e., a frequency of 27.1%. The prevalence of short birth interval (time between two live births less than 33 months) was higher in never users of modern contraceptive users (aPR=1.24; 95% CI [1.14-1.34] vs. previous users), in younger ages with aPR of 4.21 (95% CI [3.30-5.37]), 2.47 (95% CI [1.96-3.11]), and 1.45 (95% CI [1.16-1.81]), respectively for under 18, 18-24 years old, and 25-34 years old, compared to 35 and over. Childbirths occurring before the implementation of the maternal and infant free health care policy (aPR=2.13; 95% CI [1.98-2.30]) and also before the free FP policy (aPR=1.53; 95% CI [1.28-1.81]) were found also protective against SBI. Women with low socio-economic positions were more likely to have SBI. This study found a high SBI in Burkina Faso (more than one woman out of four). Our results have programmatic implications, as some factors, such as contraceptive practice and socioeconomic status, are modifiable. These factors need particular attention to lengthen birth intervals and, in turn, improve mother-child couple health by reducing short birth interval consequences.

**Keywords:** prevalence, associated factors, short birth interval, Kaya

## 1 Introduction

2 The short birth interval (time between two live births less than 33 months) has health  
3 consequences for both mother and child. It has been shown that a short birth interval,  
4 compared with a longer one (greater than or equal to 33 months), increases neonatal, infant,  
5 and child mortality by 85%, 116%, and 126%, respectively [1]. Despite the implementation of  
6 several strategies to improve maternal and infant health in many countries around the world  
7 [2–4], mortality rates remain very high globally. According to the United Nations Inter-agency  
8 Group for Child Mortality Estimation, if current trends continue, 48·1 million under-5 deaths  
9 are projected to occur between 2020 and 2030, almost half of them projected to occur during  
10 the neonatal period [5]. One of the factors contributing to these high mortality rates is the short  
11 birth interval, which could result in eclampsia, uterine rupture, post-partum hemorrhage,  
12 severe anemia, or even maternal death [6]. The hypertensive and hemorrhagic consequences  
13 may account for more than 50% of maternal mortality worldwide [7].

14 According to the literature, there are several factors associated with short birth interval:  
15 the duration of breastfeeding of the previous child, the number of antenatal care (ANC) visits  
16 for the index pregnancy, woman's level of education, woman's occupation, contraceptive  
17 practice, woman's age at marriage, the woman's age at first pregnancy, partner's religion,  
18 partner's level of education, partner's occupation, the parity of the index child, the survival of  
19 the previous birth, the place of residence and the well-being index, etc. [8–11]. Most studies  
20 have considered only the woman's most recent birth interval and therefore excluded her  
21 previous birth intervals. Some other studies did not use the World Health Organization (WHO)  
22 definition of a short birth interval, thus limiting the comparability of the findings across studies,  
23 as Islam et al. showed in their published systematic review and meta-analysis [12]. Also, a  
24 multicenter study in eight African countries concluded that the determinants of the short birth  
25 interval varied from one country to another [13]. Pimentel et al., in a systematic review, noted  
26 that shorter breastfeeding and the female sex of the previous child were the only factors  
27 systematically associated with a short birth interval. They concluded that future quantitative

28 research should use longitudinal and experimental designs and ensure consistency of  
29 outcome and exposure definitions in the search for determinants of short birth intervals [14].

30 Considering the limitations of previous studies, this study aimed to estimate the  
31 prevalence and identify the factors associated with the short birth interval in a semi-urban  
32 Municipality in Burkina Faso using the WHO definition and including all women's birth  
33 intervals.

34

## 35 **Materials and Methods**

### 36 **Study setting**

37 The study was conducted in the Kaya Demographic and Health Surveillance System  
38 (Kaya-HDSS) catchment area in Kaya municipality, North Central, Burkina Faso. This  
39 demographic and health surveillance site has been described elsewhere [15]. It has been  
40 operational since 2007 and is managed by the Institut de Recherche en Sciences de la Santé  
41 (IRSS). According to the latest General Census of Population and Housing, in 2019, Kaya's  
42 population was estimated at 208,682 [16]. In 2022, the results of the Kaya SSDS showed a  
43 resident population of 82,723, including 21,854 women aged 15 to 49 and 4,888 children  
44 under 5. This population-based observatory covers one medical center, six urban primary  
45 health centers known as the Centre de Santé et de Promotion Sociale (CSPS), six rural health  
46 centers, and some private health centers. In addition to these primary health centers, the  
47 observatory area is also home to the Regional Hospital (CHR), which provides specialist care  
48 and acts as a referral center for the health centers in the four provinces of the Centre-Nord  
49 region. The Kaya demographic and health surveillance site aims to study demographic,  
50 infectious, and chronic disease indicators in the district, observe changes in health over time,  
51 evaluate health programs, and provide a basis for policy decisions and capacity to improve  
52 the health of the community [17].

53

### 54 **Study design and period**

55 We conducted a population-based cross-sectional study. Data were collected between  
 56 May and October 2022 in the demographic and health surveillance system catchment area.

57 **Study population**

58 The study population consisted of women of childbearing age (15 to 49 years) living in  
 59 the Kaya demographic and health surveillance site.

60 **Inclusion criteria**

61 This study included women who had had at least two consecutive live births in the  
 62 previous ten years (2012-2022) and were present in the households when the interviewers  
 63 visited.

64 **Study variables**

65 The dependent variable in our study was the birth interval for two consecutive live  
 66 births, a binary variable coded '1' for a birth interval of less than 33 months (considered as  
 67 short) and '0' for a birth interval of 33 months or more (considered as optimal), based on the  
 68 WHO definition [18]. We used all children's dates per woman from 2012 to 2022. Due to the  
 69 hierarchical type of the variables, we considered three levels: (i) the delivery level, the woman  
 70 level (woman could have many deliveries), and the village level. For each level, independent  
 71 variables were defined, as shown in Table 1.

72 Table 1: level-related independent variables

| Level                              | Independent variables                                                       | Modalities                              |
|------------------------------------|-----------------------------------------------------------------------------|-----------------------------------------|
| level 1: deliveries                | Childbirth during free maternal and child health care policy implementation | (Yes or No)                             |
|                                    | Childbirth before free family planning policy implementation                | (Yes or No)                             |
|                                    | Pregnancy rank                                                              | (from 2 to 10)                          |
| Level 2: woman (variable woman id) | Women's age at the start of pregnancy (in years)                            | Under 18, 18-24, 25-34, 35 and over     |
|                                    | Woman marital status (in union)                                             | (Yes or No)                             |
|                                    | Wealth quintiles                                                            | Lowest, Second, Middle, Fourth, Highest |
|                                    | Ever used a modern method of contraception                                  | (Yes or No)                             |
| Level 3: village level             | Place of residence                                                          | Urban, Rural                            |

73

## 74 **Data source and collection**

75 Data were collected through individual interviews with women who met the inclusion  
76 criteria and were present in the households when the interviewers visited. Some data were  
77 extracted from women's health records and children's birth certificates. The questionnaire  
78 included variables such as past and current contraceptive use, the outcome of each  
79 pregnancy, the survival of each child, and so on. The data from this study were supplemented  
80 by data from the Kaya-HDSS, which are repeated cross-sectional study data. The data  
81 extracted from Kaya-HDSS mainly concerned the socio-demographic characteristics of  
82 women and their households, socio-economic level, etc.

## 83 **Data analysis**

84 The data were analyzed using Stata software version 18.0 [19]. Qualitative variables  
85 were described using frequencies. Because of the data structure (women have multiple birth  
86 intervals), we performed a multilevel mixed-effects Poisson regression with robust variance to  
87 determine the factors associated with the short birth interval by reporting prevalence ratios  
88 (PR) with a 95% confidence interval rather than odds ratios to avoid a poor approximation of  
89 risk because the prevalence found was not low [20–22]. After fitting the null model (model 1),  
90 we first included the level-1 variables (model 2), then the level-2 variables (model 3), and  
91 lastly, the level-3 variables (model 4). These models are available in Supplementary File 1.  
92 The results of the final multivariable model are shown in Table IV, and its selection was based  
93 on the Akaike Information Criteria (AIC) and Bayesian Information Criteria (BIC). All statistical  
94 tests were two-sided; a p-value < 0.05 was considered statistically significant.

## 95 **Ethical considerations**

96 The study protocol was approved by the Burkina Faso Health Research Ethics  
97 Committee (Deliberation Number 2021-07-165). Informed consent was obtained from each  
98 participant before the questionnaire was administered. Women's anonymity and confidentiality  
99 were ensured throughout data collection and processing.

## 100 **Results**

101 Four thousand one hundred eight women had at least two consecutive live births  
102 between 2012 and 2022 and were included in this study. Of these, 40 were excluded because  
103 of inconsistent data on birth dates. In total, 5,544 birth intervals were analyzed. Fig 1 below  
104 shows the flow chart.

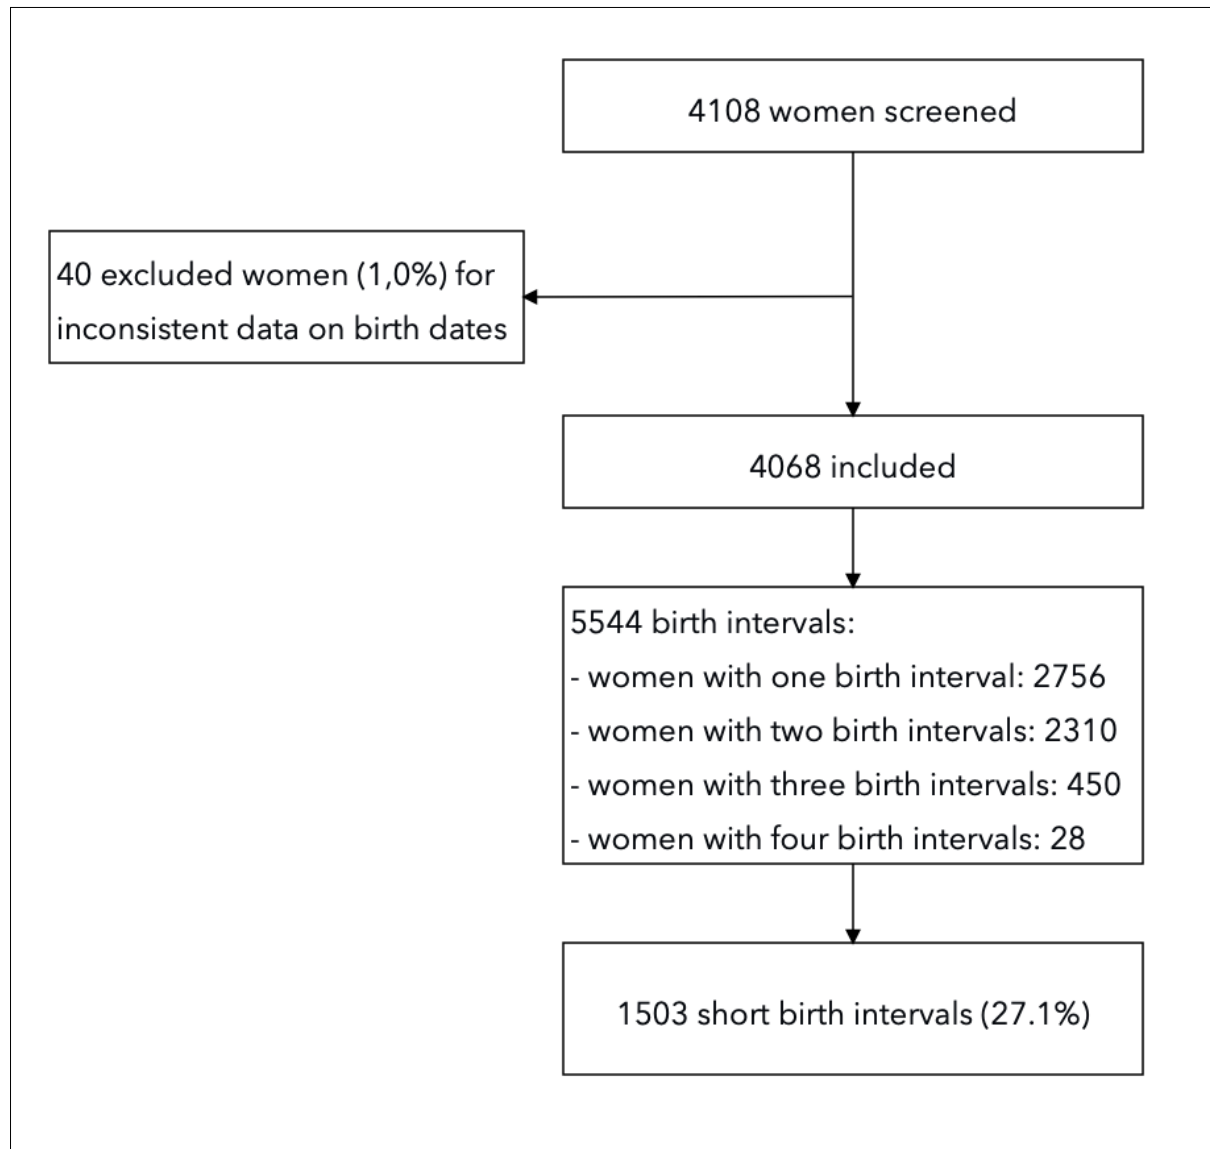

105  
106 Figure 1: study flow chart

### 107 **Characteristics of pregnancies and deliveries**

108 Out of the deliveries, 81.5% occurred during maternal and infant-free healthcare (after  
109 1 June 2016), and 13.3% of pregnancies began during free family planning (after 1 July 2020),  
110 as detailed in Table 2.

### 111 **Table 2: Characteristics of pregnancies and births (N=5544)**

| <b>Characteristics of pregnancies and births</b>                   | <b>N=5544</b> | <b>%</b> |
|--------------------------------------------------------------------|---------------|----------|
| <b>Age at the start of pregnancy</b>                               |               |          |
| Under 18                                                           | 326           | 5,9      |
| 18-24                                                              | 2233          | 40,3     |
| 25-34                                                              | 2472          | 44,6     |
| 35 and over                                                        | 513           | 9,3      |
| <b>Pregnancy rank (first to last pregnancy)</b>                    |               |          |
| 2                                                                  | 1521          | 27,4     |
| 3                                                                  | 1329          | 24,0     |
| 4                                                                  | 1062          | 19,2     |
| 5                                                                  | 758           | 13,7     |
| 6                                                                  | 459           | 8,3      |
| 7                                                                  | 222           | 4,0      |
| 8                                                                  | 109           | 2,0      |
| 9                                                                  | 58            | 1,0      |
| 10 and over                                                        | 26            | 0,5      |
| <b>Childbirth during maternal and child free healthcare policy</b> |               |          |
| No                                                                 | 1025          | 18,5     |
| Yes                                                                | 4519          | 81,5     |
| <b>Pregnancy during free family planning policy implementation</b> |               |          |
| No                                                                 | 4809          | 86,7     |
| Yes                                                                | 735           | 13,3     |

112  
113

#### 114 **Characteristics of the women**

115 Women who had ever used a modern method of contraception were 71.0%, and 95.7%  
116 of women were in union. Table 3 shows the socio-demographic characteristics of the women.

117 **Table 3: Socio-demographic characteristics of the women**

| <b>Socio-demographic characteristics</b> | <b>N=4068</b> | <b>%</b> |
|------------------------------------------|---------------|----------|
| <b>Main occupation</b>                   |               |          |
| Housewife                                | 2235          | 54,9     |
| Farmer                                   | 749           | 18,4     |
| Shopkeeper                               | 964           | 23,7     |
| Student/Public or private worker         | 120           | 2,9      |
| <b>Woman in union</b>                    |               |          |
| No                                       | 174           | 4,3      |
| Yes                                      | 3894          | 95,7     |
| <b>Place of residence</b>                |               |          |
| Urban                                    | 2479          | 60,9     |



|                                                   |      |      |
|---------------------------------------------------|------|------|
| Rural                                             | 1589 | 39,1 |
| <b>Wealth quintiles</b>                           |      |      |
| Lowest                                            | 955  | 23,5 |
| Second                                            | 806  | 19,8 |
| Middle                                            | 783  | 19,2 |
| Fourth                                            | 776  | 19,1 |
| Highest                                           | 748  | 18,4 |
| <b>Ever used a modern method of contraception</b> |      |      |
| No                                                | 1178 | 29,0 |
| Yes                                               | 2890 | 71,0 |

118

119 **Prevalence of short birth interval and associated factors**

120 A short birth interval was observed in 1503 cases out of 5544, i.e., a frequency of  
 121 27.1% (95% CI: 26.0-28.3). Table 4 shows the factors associated with a short birth interval in  
 122 univariable and multivariable analyses. For example, the adjusted analyses showed that the  
 123 prevalence of short birth interval was increased by 24% in women who had never used a  
 124 modern contraceptive method (aPR=1.24; 95% CI [1.14-1.34]) compared with those who ever  
 125 used it. Women aged under 18 during their pregnancies, and those aged 18-24, and 25-34,  
 126 were respectively, 4.21, 2.47, and 1.45 times more likely to experience a SBI, compared with  
 127 those aged over 35. Other factors, such as pregnancy rank, wealth quintiles, the infant and  
 128 mother free healthcare policy, and the free family planning policy, were strongly associated  
 129 with the short birth interval.

130 **Table 4: Results of univariate and multivariate analyses (N=5544)**

|                                                                                     | <b>Crude<br/>Prevalence<br/>Ratio (95% CI)</b> | <b>p</b> | <b>Adjusted<br/>Prevalence<br/>Ratio (95%<br/>CI)</b> | <b>p</b> |
|-------------------------------------------------------------------------------------|------------------------------------------------|----------|-------------------------------------------------------|----------|
| <b>Childbirth during women and<br/>infant and mother free healthcare<br/>policy</b> |                                                |          |                                                       |          |
| No                                                                                  | 2.53(2.34-<br>2.75)                            | <0.001   | 2.13(1.98-<br>2.30)                                   | <0.001   |
| Yes                                                                                 |                                                |          |                                                       |          |
| <b>Pregnancy during free family<br/>planning policy implementation</b>              |                                                |          |                                                       |          |
| No                                                                                  | 2.04(1.71-<br>2.42)                            | <0.001   | 1.53(1.28-<br>1.81)                                   | <0.001   |
| Yes                                                                                 |                                                |          |                                                       |          |
| <b>Pregnancy rank</b>                                                               |                                                |          |                                                       |          |

|                                                   |                 |        |                 |        |
|---------------------------------------------------|-----------------|--------|-----------------|--------|
| 2                                                 | 0.76(0.42-1.35) | 0.347  | 0.45(0.24-0.85) | 0.013  |
| 3                                                 | 0.66(0.38-1.14) | 0.138  | 0.49(0.27-0.88) | 0.018  |
| 4                                                 | 0.61(0.33-1.12) | 0.109  | 0.55(0.29-1.05) | 0.069  |
| 5                                                 | 0.56(0.32-0.98) | 0.044  | 0.59(0.33-1.05) | 0.074  |
| 6                                                 | 0.60(0.32-1.11) | 0.106  | 0.67(0.36-1.25) | 0.210  |
| 7                                                 | 0.72(0.41-1.25) | 0.237  | 0.77(0.46-1.29) | 0.324  |
| 8                                                 | 0.83(0.47-1.47) | 0.521  | 0.99(0.55-1.78) | 0.975  |
| 9                                                 | 1.06(0.61-1.83) | 0.845  | 0.93(0.56-1.54) | 0.766  |
| 10 and over                                       |                 |        |                 |        |
| <b>Age at pregnancy</b>                           |                 |        |                 |        |
| Under 18                                          | 3.06(2.50-3.76) | <0.001 | 4.21(3.30-5.37) | <0.001 |
| 18-24                                             | 1.63(1.34-1.98) | <0.001 | 2.47(1.96-3.11) | <0.001 |
| 25-34                                             | 1.13(0.92-1.39) | 0.257  | 1.45(1.16-1.81) | 0.001  |
| 35 and over                                       |                 |        |                 |        |
| <b>Woman in union</b>                             |                 |        |                 |        |
| No                                                |                 |        |                 |        |
| Yes                                               | 0.73(0.60-0.87) | 0.001  | 0.85(0.71-1.02) | 0.077  |
| <b>Wealth quintiles</b>                           |                 |        |                 |        |
| Lowest                                            | 1.49(1.26-1.76) | <0.001 | 1.30(1.04-1.62) | 0.020  |
| Second                                            | 1.50(1.36-1.65) | <0.001 | 1.28(1.12-1.47) | <0.001 |
| Middle                                            | 1.35(1.19-1.54) | <0.001 | 1.18(1.01-1.38) | 0.040  |
| Fourth                                            | 1.08(0.94-1.24) | 0.289  | 1.02(0.87-1.19) | 0.850  |
| Highest                                           |                 |        |                 |        |
| <b>Ever used a modern method of contraception</b> |                 |        |                 |        |
| No                                                | 1.32(1.22-1.44) | <0.001 | 1.24(1.14-1.34) | <0.001 |
| Yes                                               |                 |        |                 |        |
| <b>Place of residence</b>                         |                 |        |                 |        |
| Urban                                             |                 |        |                 |        |
| Rural                                             | 1.16(1.01-1.34) | 0.037  | 0.91(0.79-1.03) | 0.143  |
| <b>Main occupation</b>                            |                 |        |                 |        |
| Housewife                                         | 1.42(1.15-1.74) | 0.001  |                 |        |

|                                  |                 |       |  |  |
|----------------------------------|-----------------|-------|--|--|
| Farmer                           | 1.42(1.07-1.90) | 0.016 |  |  |
| Shopkeeper                       | 1.04(0.80-1.35) | 0.764 |  |  |
| Student/Public or private worker |                 |       |  |  |

131

## 132 **Discussion**

133       The proportion of short birth intervals was 27.1% in our study. This is high in a context  
134 where many actions are being undertaken to promote modern contraceptive methods. Some  
135 of the factors found in our study can be addressed by implementing or reinforcing specific  
136 health policies. For example, our results show that the prevalence of the short birth interval  
137 has significantly decreased after the start of free family planning policy nationwide in 2019.  
138 This policy, therefore, needs to be monitored to ensure that it continues to be effective with  
139 women. This high prevalence should raise questions and lead to a strengthening of health  
140 policies aimed at birth spacing.

141       This high prevalence is common in many African countries. It has also been noted in  
142 the literature, ranging from 16.99% to 58.74%: analyses carried out on Demographic and  
143 Health Survey (DHS) databases showed that the pooled prevalence was 16.99% for 12 East  
144 African countries in a study published in 2023 [10], and 58.74% as a pooled prevalence in 10  
145 African countries with high fertility [23]. Another study in 35 sub-Saharan African countries  
146 found a pooled prevalence of 43.91%, with South Africa having the lowest prevalence  
147 (23.25%) and Chad having the highest (59.28%). In the same study, the authors also noted  
148 that 14 of the 35 countries had a higher prevalence than the sub-Saharan African average of  
149 43.91% [24]. Several community-based cross-sectional studies carried out in Ethiopia give  
150 similar high prevalence, such as 56% in 2020 [25] and 30.59% in the north-west in 2021 [26]

151       Our study has shown that women's age at the pregnancy, contraceptive use in the  
152 woman's reproductive life, socioeconomic status of the woman, and pregnancy rank were  
153 associated with SBI. Several studies [27–29] have also found similar results. Therefore,  
154 women who practice family planning and can intentionally choose to space their births are  
155 logically less likely to experience a short birth interval.

156 Our results also showed that the wealth index was associated with a short birth interval:  
157 the prevalence of a short birth interval was higher among women in the poor and very poor  
158 quintiles than their counterparts in the rich and very rich quintiles. This result supports the  
159 conclusions of several other studies [30–33]. Women in the wealthiest groups had greater  
160 access to quality primary care than women in the poorest group. For example, women in the  
161 rich and very rich quintiles would benefit from more prenatal contacts. However, an increase  
162 in antenatal visits has been shown to reduce the risk of having a short birth interval [34].  
163 Furthermore, women in the rich and very rich quintiles may be better educated than those in  
164 the poorer groups. Given the strong link between education level and desire for children  
165 (negative association between formal schooling and desired fertility) [35,36], they could,  
166 therefore, space births better than poor women. However, a study in Ethiopia showed that  
167 poor households were less likely than wealthy households to have a short birth interval [37].  
168 This author nevertheless pointed out the presence of recall bias in his study concerning the  
169 actual interval between births and bias in the measurement of the wealth index, which could  
170 explain his results, which were at odds with ours and the data in the literature.

171 In our study, the place of residence did not determine the birth interval length. While  
172 some studies have shown no difference between rural and urban women regarding the length  
173 of the birth interval [38,39], others have shown that rural women are more likely to have a  
174 short birth interval than urban women [32,40,41]. A difference in the composition of the place  
175 of residence in these countries could justify the differences between these results.  
176 Furthermore, in our study, the Nord Central region, where the Kaya-HDSS is located, has  
177 been affected by security issues for nearly eight years now, and many rural women from the  
178 rural areas have moved to the city of Kaya. Therefore, the place of residence variable is  
179 subject to significant misclassification, which may explain the lack of association between the  
180 place of residence and the short birth interval.

181 Finally, it should be noted that the short birth interval may be the result of a deliberate  
182 choice on the part of the woman or even the couple: in Nigeria, in 2010, a study reported as  
183 its main findings the fact that the women attributed responsibility for a high parity to their

184 husbands. They had deliberately given birth to many children to inhibit men's tendency to  
185 divorce or enter into multiple marriages [42].

186 The main strengths of this study are (i) its design, which uses data from all women's  
187 birth intervals over ten years, and (ii) the multilevel mixed-effects Poisson regression with  
188 robust variance we performed to determine the factors associated with the short birth interval  
189 by reporting prevalence ratios, compared to previous studies. The main limitation is the recall  
190 bias that arises when women are asked about past events, such as past childbirths, if the  
191 existing documentation does not allow the event to be located accurately.

## 192 **Conclusion**

193 At the end of this study, we found that the prevalence of short birth intervals is still high  
194 in Burkina Faso (more than one woman in four). Our results have programmatic implications  
195 because some factors, such as contraceptive practice and socioeconomic status, are  
196 modifiable. These factors merit particular attention to lengthening birth intervals and, in turn,  
197 reduce their consequences by improving the health of the mother-child couple. Activities to  
198 encourage contraceptive use should, therefore, be stepped up to increase the number of new  
199 users and retain existing users. These users will increase their chances of having an  
200 appropriate birth interval.

201

202

## 203 **Authors' contributions**

204 Conceptualization: AC. Methodology: AC. Supervision of data collection: AC, AB, FG.  
205 Validation: AC, AB, FG. Formal analysis: AC, AB, BIM, TM. Writing-original draft preparation:  
206 AC. Writing-review and editing: AC, AB, BIM, TM, AMAK. Project administration: AB, SK.  
207 Funding acquisition: SK. All authors have read and agreed to the published version of the  
208 manuscript.

## 209 **Acknowledgements:**

210 We sincerely thank Fatou Sissoko, Vincent Bagnoa, Bouraima Kabré, Ambroise Bamogo and  
211 all the interviewers for their support during data collection.

212



## 214 References

- 215 1. Shifti DM, Chojenta C, Holliday E, Loxton D. Effects of short birth interval on neonatal,  
216 infant and under-five child mortality in Ethiopia: a nationally representative observational  
217 study using inverse probability of treatment weighting. *BMJ Open*. 2021 Aug  
218 18;11(8):e047892.
- 219 2. Gülmezoglu AM, Lawrie TA, Hezelgrave N, Oladapo OT, Souza JP, Gielen M, et al.  
220 Interventions to Reduce Maternal and Newborn Morbidity and Mortality. In: Black RE,  
221 Laxminarayan R, Temmerman M, Walker N, editors. *Reproductive, Maternal, Newborn,  
222 and Child Health: Disease Control Priorities, Third Edition (Volume 2)* [Internet].  
223 Washington (DC): The International Bank for Reconstruction and Development / The  
224 World Bank; 2016 [cited 2024 Jan 10]. Available from:  
225 <http://www.ncbi.nlm.nih.gov/books/NBK361904/>
- 226 3. Lassi ZS, Bhutta ZA. Community-based intervention packages for reducing maternal and  
227 neonatal morbidity and mortality and improving neonatal outcomes. *Cochrane Database  
228 Syst Rev*. 2015 Mar 23;2015(3):CD007754.
- 229 4. Kuruvilla S, Schweitzer J, Bishai D, Chowdhury S, Caramani D, Frost L, et al. Success  
230 factors for reducing maternal and child mortality. *Bull World Health Organ* [Internet]. 2014  
231 Jul 1 [cited 2024 Jan 10];92(7):533–44. Available from:  
232 <https://www.ncbi.nlm.nih.gov/pmc/articles/PMC4121875/>
- 233 5. Sharrow D, Hug L, You D, Alkema L, Black R, Cousens S, et al. Global, regional, and  
234 national trends in under-5 mortality between 1990 and 2019 with scenario-based  
235 projections until 2030: a systematic analysis by the UN Inter-agency Group for Child  
236 Mortality Estimation. *Lancet Glob Health*. 2022 Feb;10(2):e195–206.
- 237 6. Sanga LA, Mtuy T, Philemon RN, Mahande MJ. Inter-pregnancy interval and associated  
238 adverse maternal outcomes among women who delivered at Kilimanjaro Christian  
239 Medical Centre in Tanzania, 2000-2015. *PloS One*. 2020;15(2):e0228330.
- 240 7. Say L, Chou D, Gemmill A, Tunçalp O, Moller A, Daniels J. Global causes of maternal  
241 death: A WHO systematic analysis. *Lancet Glob Heal*. 2014;2(6):323–33.
- 242 8. Ajayi AI, Somefun OD. Patterns and determinants of short and long birth intervals among  
243 women in selected sub-Saharan African countries. *Medicine (Baltimore)*. 2020  
244 May;99(19):e20118.
- 245 9. Belachew TB, Asmamaw DB, Negash WD. Short birth interval and its predictors among  
246 reproductive age women in high fertility countries in sub-Saharan Africa: a multilevel  
247 analysis of recent Demographic and Health Surveys. *BMC Pregnancy Childbirth*  
248 [Internet]. 2023 Jan 30 [cited 2024 Jan 10];23:81. Available from:  
249 <https://www.ncbi.nlm.nih.gov/pmc/articles/PMC9885595/>
- 250 10. Tesema GA, Wolde M, Tamirat KS, Worku MG, Fente BM, Tsega SS, et al. Factors  
251 associated with short birth interval among reproductive-age women in East Africa.  
252 *Womens Health* [Internet]. 2023 Jan 1 [cited 2024 Jan 10];19:17455057231209879.  
253 Available from: <https://doi.org/10.1177/17455057231209879>
- 254 11. Pimentel J, Ansari U, Omer K, Gidado Y, Baba MC, Andersson N, et al. Factors  
255 associated with short birth interval in low- and middle-income countries: a systematic  
256 review. *BMC Pregnancy Childbirth* [Internet]. 2020 [cited 2022 Jan 25];20. Available  
257 from: <https://www.ncbi.nlm.nih.gov/pmc/articles/PMC7069040/>

- 258 12. Islam MZ, Billah A, Islam MM, Rahman M, Khan N. Negative effects of short birth interval  
259 on child mortality in low- and middle-income countries: A systematic review and meta-  
260 analysis. *J Glob Health*. 2022 Sep 3;12:04070.
- 261 13. Ajayi AI, Somefun OD. Patterns and determinants of short and long birth intervals among  
262 women in selected sub-Saharan African countries. *Medicine (Baltimore)*. 2020 May  
263 8;99(19):e20118.
- 264 14. Pimentel J, Ansari U, Omer K, Gidado Y, Baba MC, Andersson N, et al. Factors  
265 associated with short birth interval in low- and middle-income countries: a systematic  
266 review. *BMC Pregnancy Childbirth* [Internet]. 2020 Mar 12 [cited 2024 Jan 10];20(1):156.  
267 Available from: <https://doi.org/10.1186/s12884-020-2852-z>
- 268 15. Kouanda S, Bado A, Yaméogo M, Nitiéma J, Yaméogo G, Bocoum F, et al. The Kaya  
269 HDSS, Burkina Faso: a platform for epidemiological studies and health programme  
270 evaluation. *Int J Epidemiol* [Internet]. 2013 Jun 1 [cited 2024 Jan 10];42(3):741–9.  
271 Available from: <https://doi.org/10.1093/ije/dyt076>
- 272 16. Institut National de la Statistique et de la Démographie du Burkina Faso. Rapport  
273 préliminaire de l'Enquête Démographique et de Santé (EDS-IV) et à Indicateurs  
274 Multiples (MICS) EDSBF-MICS IV. Ouagadougou: Institut National de la Statistique et  
275 de la Démographie du Burkina Faso; 2011 Aout p. 50.
- 276 17. Kouanda S, Bado A, Yaméogo M, Nitiéma J, Yaméogo G, Bocoum F, et al. The Kaya  
277 HDSS, Burkina Faso: a platform for epidemiological studies and health programme  
278 evaluation. *Int J Epidemiol*. 2013 Jun;42(3):741–9.
- 279 18. World Health Organization. Report of a WHO technical consultation on birth spacing:  
280 Geneva, Switzerland 13–15 June 2005 [Internet]. 2005 [cited 2024 Mar 1]. Available  
281 from: <https://www.who.int/publications-detail-redirect/WHO-RHR-07.1>
- 282 19. StataCorp. Stata Statistical Software: Release 18. College Station, TX: StataCorp LLC;  
283 2023.
- 284 20. Zou G. A modified poisson regression approach to prospective studies with binary data.  
285 *Am J Epidemiol*. 2004 Apr 1;159(7):702–6.
- 286 21. Chen W, Qian L, Shi J, Franklin M. Comparing performance between log-binomial and  
287 robust Poisson regression models for estimating risk ratios under model misspecification.  
288 *BMC Med Res Methodol* [Internet]. 2018 Jun 22 [cited 2024 Jan 11];18(1):63. Available  
289 from: <https://doi.org/10.1186/s12874-018-0519-5>
- 290 22. Zou G, Donner A. Extension of the modified Poisson regression model to prospective  
291 studies with correlated binary data. *Stat Methods Med Res* [Internet]. 2013 Dec 1 [cited  
292 2024 Jan 11];22(6):661–70. Available from: <https://doi.org/10.1177/0962280211427759>
- 293 23. Belachew TB, Asmamaw DB, Negash WD. Short birth interval and its predictors among  
294 reproductive age women in high fertility countries in sub-Saharan Africa: a multilevel  
295 analysis of recent Demographic and Health Surveys. *BMC Pregnancy Childbirth*  
296 [Internet]. 2023 Jan 30 [cited 2024 Jan 11];23(1):81. Available from:  
297 [https://bmcpregnancychildbirth.biomedcentral.com/articles/10.1186/s12884-023-05403-](https://bmcpregnancychildbirth.biomedcentral.com/articles/10.1186/s12884-023-05403-0)  
298 0
- 299 24. Mare KU, Sabo KG, Mohammed AA, Leyto SM, Mulaw GF, Tebeje TM, et al. Suboptimal  
300 birth spacing practice and its predictors among reproductive-age women in Sub-Saharan



- 301 African countries: a multilevel mixed-effects modeling with robust Poisson regression.  
302 *Reprod Health* [Internet]. 2023 Sep 4 [cited 2024 Jan 11];20:132. Available from:  
303 <https://www.ncbi.nlm.nih.gov/pmc/articles/PMC10476311/>
- 304 25. Wakeyo MM, Kebira JY, Assefa N, Dheresa M. Short birth interval and its associated  
305 factors among multiparous women in Mieso agro-pastoralist district, Eastern Ethiopia: A  
306 community-based cross-sectional study. *Front Glob Womens Health* [Internet]. 2022 Sep  
307 7 [cited 2024 Jan 11];3:801394. Available from:  
308 <https://www.ncbi.nlm.nih.gov/pmc/articles/PMC9490409/>
- 309 26. Gelagay AA, Worku AG, Bashah DT, Tebeje NB, Gebrie MH, Yeshita HY, et al. Factors  
310 affecting birth interval among mothers in Dabat district, Amhara Regional state,  
311 Northwest Ethiopia: A community-based cross-sectional study, 2022. *Heliyon*. 2023  
312 Jun;9(6):e17046.
- 313 27. de Jonge HCC, Azad K, Seward N, Kuddus A, Shaha S, Beard J, et al. Determinants  
314 and consequences of short birth interval in rural Bangladesh: a cross-sectional study.  
315 *BMC Pregnancy Childbirth*. 2014 Dec 24;14:427.
- 316 28. Dim CC, Ugwu EO, Iloghalu EI. Duration and determinants of inter-birth interval among  
317 women in Enugu, south-eastern Nigeri. *J Obstet Gynaecol*. 2013 Feb 1;33(2):175–9.
- 318 29. Ejigu AG, Yismaw AE, Limenih MA. The effect of sex of last child on short birth interval  
319 practice: the case of northern Ethiopian pregnant women. *BMC Res Notes*. 2019 Feb  
320 4;12(1):75.
- 321 30. Shifti DM, Chojenta C, G Holliday E, Loxton D. Individual and community level  
322 determinants of short birth interval in Ethiopia: A multilevel analysis. *PLoS One*.  
323 2020;15(1):e0227798.
- 324 31. Hailu D, Gulte T. Determinants of Short Interbirth Interval among Reproductive Age  
325 Mothers in Arba Minch District, Ethiopia. *Int J Reprod Med*. 2016;2016:1–17.
- 326 32. Shifti DM, Chojenta C, Holliday EG, Loxton D. Socioeconomic inequality in short birth  
327 interval in Ethiopia: a decomposition analysis. *BMC Public Health*. 2020 Oct  
328 6;20(1):1504.
- 329 33. Pimentel J, Ansari U, Omer K, Gidado Y, Baba MC, Andersson N, et al. Factors  
330 associated with short birth interval in low- and middle-income countries: a systematic  
331 review. *BMC Pregnancy Childbirth*. 2020 Mar 12;20(1):156.
- 332 34. Mihretie GN, Yenealem Beyene F, Getnet Kassa B, Degu Ayele A, Muche Liyeh T,  
333 Minuye Biriha B. Determinants of short birth interval among women in South Gondar,  
334 Ethiopia: community-based unmatched case-control study. *Arch Public Health Arch Belg  
335 Sante Publique*. 2021 Apr 9;79(1):47.
- 336 35. Church AC, Ibitoye M, Chettri S, Casterline JB. Traditional supports and contemporary  
337 disrupters of high fertility desires in sub-Saharan Africa: a scoping review. *Reprod Health*  
338 [Internet]. 2023 Jun 6 [cited 2024 Jan 11];20(1):86. Available from:  
339 <https://doi.org/10.1186/s12978-023-01627-7>
- 340 36. Bongaarts J. Trends in fertility and fertility preferences in sub-Saharan Africa: the roles  
341 of education and family planning programs. *Genus* [Internet]. 2020 Sep 21 [cited 2024  
342 Jan 11];76(1):32. Available from: <https://doi.org/10.1186/s41118-020-00098-z>

- 343 37. Yohannes S, Wondafrash M, Abera M, Girma E. Duration and determinants of birth  
344 interval among women of child bearing age in Southern Ethiopia. *BMC Pregnancy*  
345 *Childbirth*. 2011 May 20;11(1):38.
- 346 38. Chirwa TF, Mantempa JN, Kinziunga FL, Kandala JD, Kandala NB. An exploratory  
347 spatial analysis of geographical inequalities of birth intervals among young women in the  
348 Democratic Republic of Congo (DRC): a cross-sectional study. *BMC Pregnancy*  
349 *Childbirth*. 2014 Aug 13;14:271.
- 350 39. Exavery A, Mrema S, Shamte A, Bietsch K, Mosha D, Mbaruku G, et al. Levels and  
351 correlates of non-adherence to WHO recommended inter-birth intervals in Rufiji,  
352 Tanzania. *BMC Pregnancy Childbirth*. 2012 Dec 13;12:152.
- 353 40. Aychiluhm SB, Tadesse AW, Mare KU, Abdu M, Ketema A. A multilevel analysis of short  
354 birth interval and its determinants among reproductive age women in developing regions  
355 of Ethiopia. *PLOS ONE*. 2020 Aug 26;15(8):e0237602.
- 356 41. Ngianga-Bakwin K, Stones RW. Birth intervals and injectable contraception in sub-  
357 Saharan Africa. *Contraception*. 2005 May;71(5):353–6.
- 358 42. Izugbara CO, Ezech AC. Women and high fertility in Islamic northern Nigeria. *Stud Fam*  
359 *Plann*. 2010 Sep;41(3):193–204.

360

361

362

363

364

365

366

367

368

369

370

371

372

373

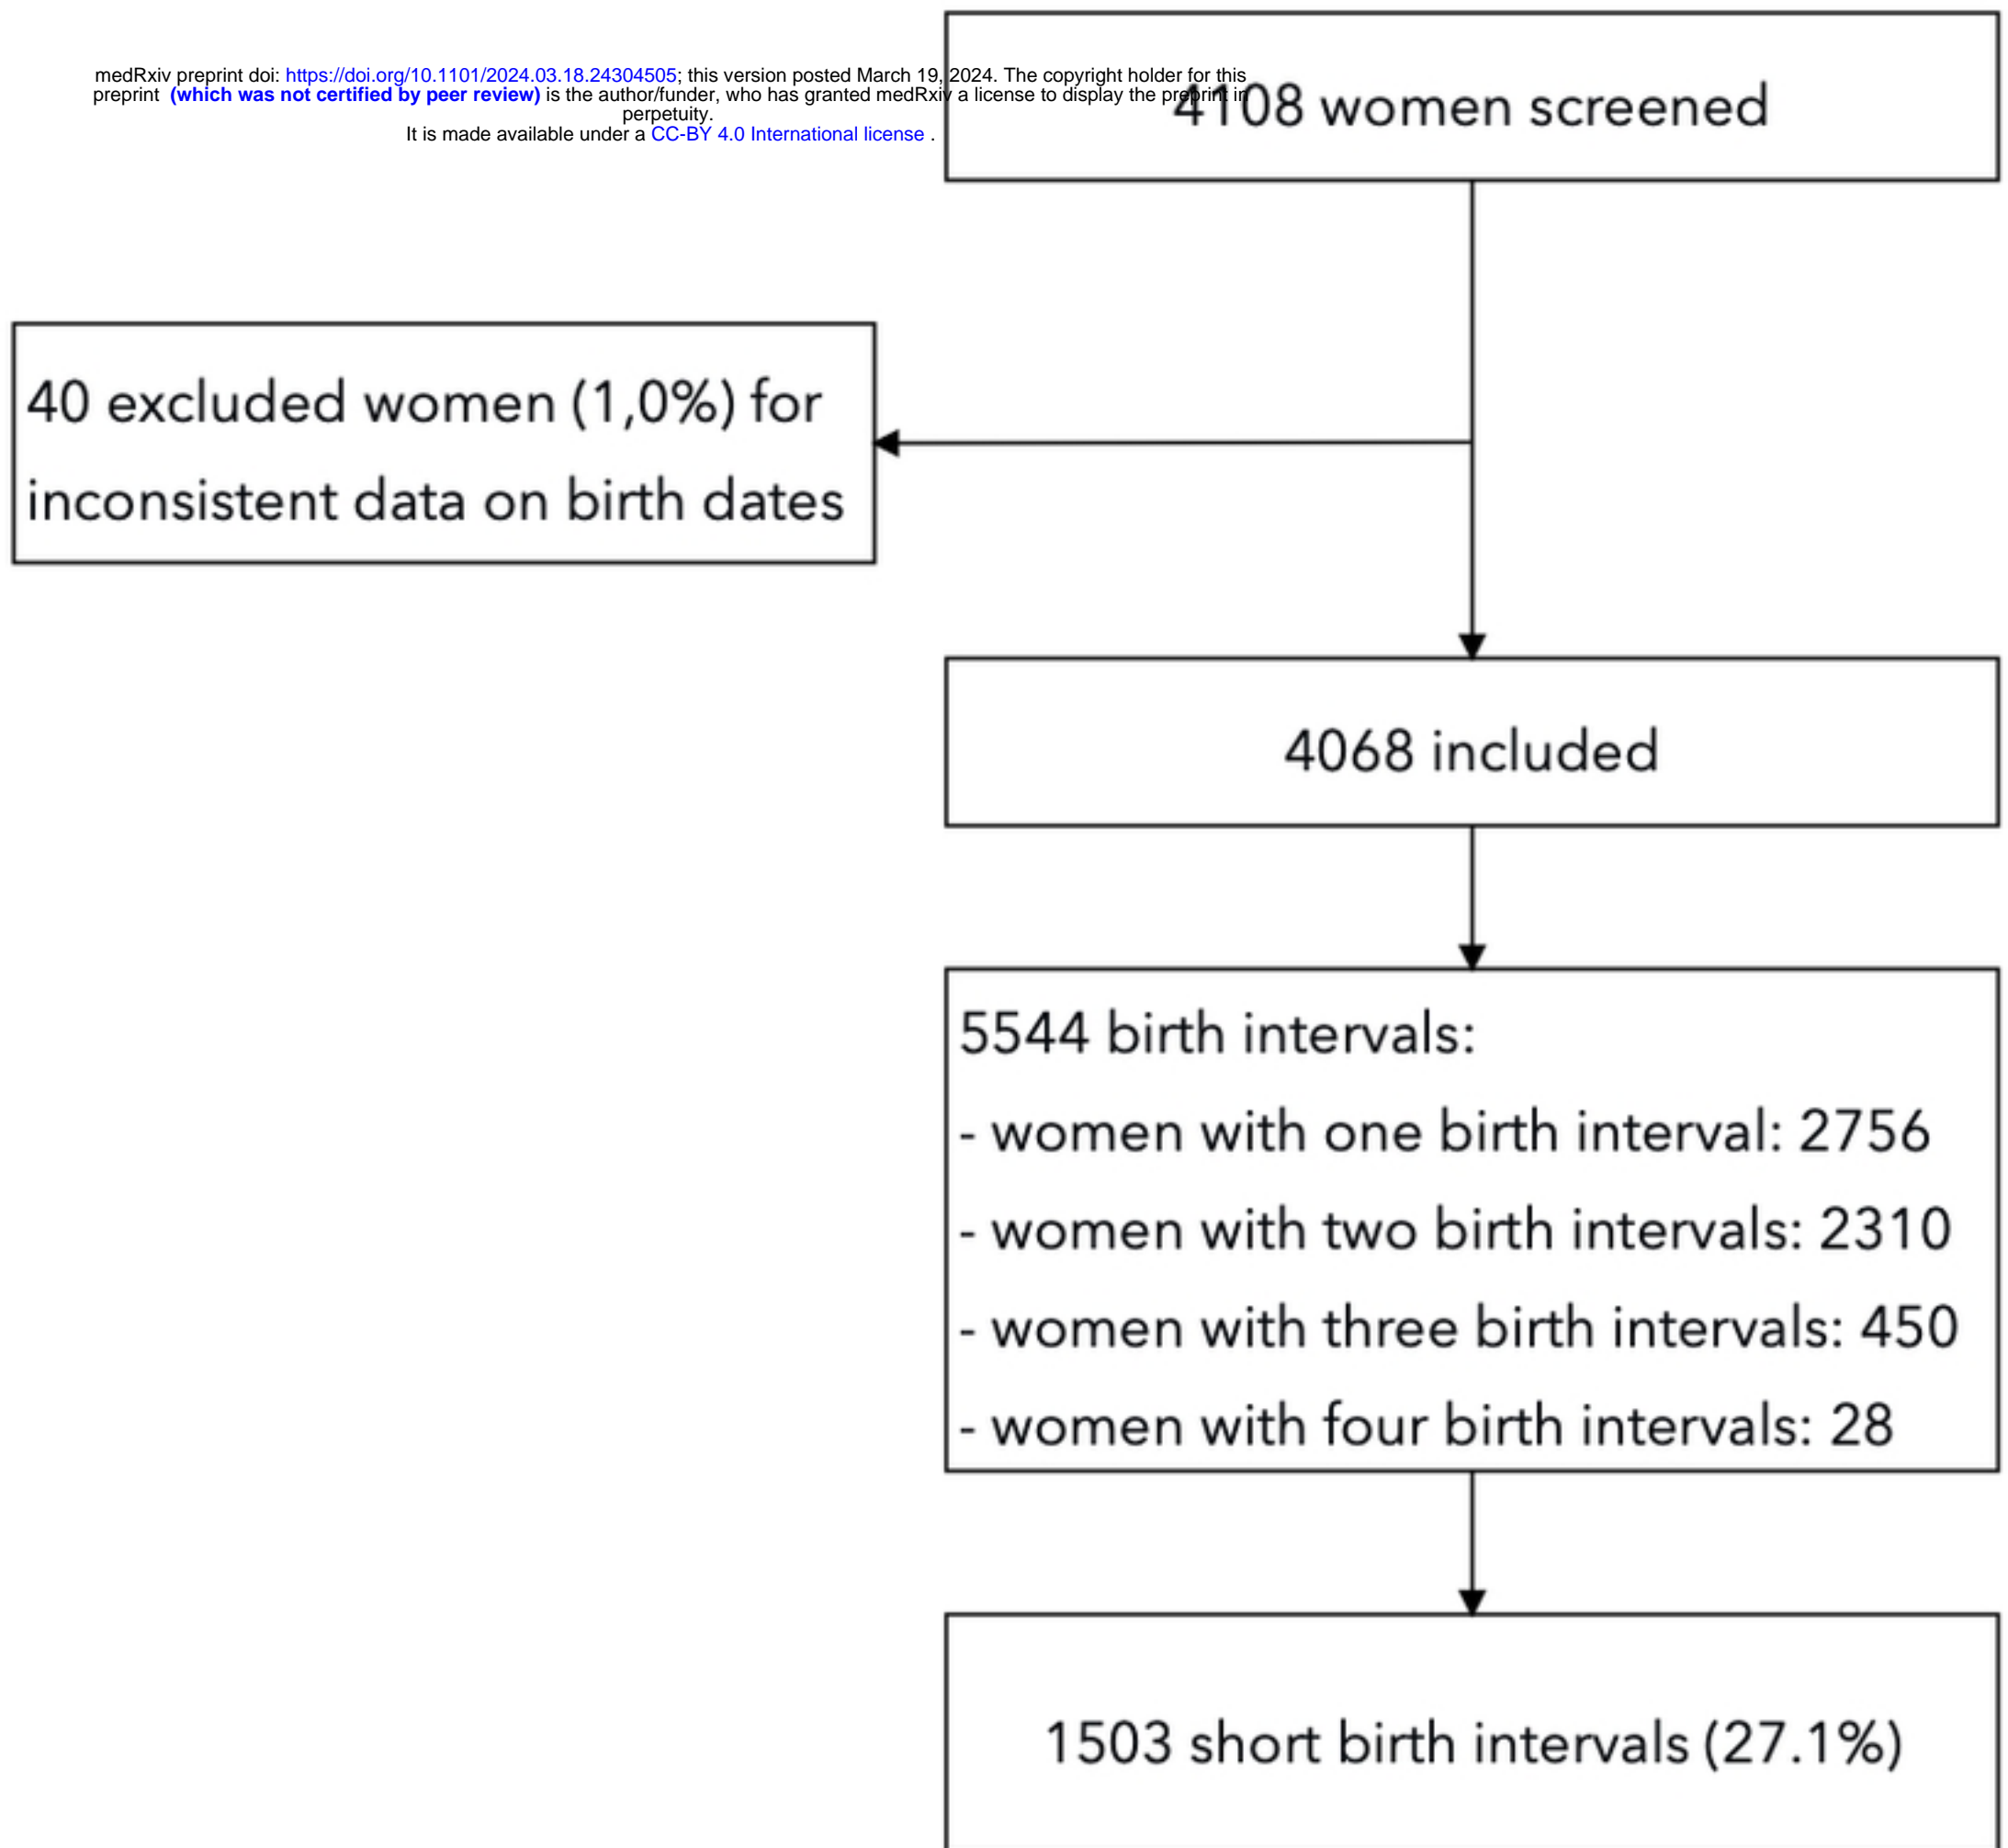

Figure
